# Supplementary material for: High-efficiency photocatalytic water splitting by a N-doped porous g-C3N4 nanosheet polymer photocatalyst derived from urea and N,N-dimethylformamide
Source: Royal Society of Chemistry journal article supplement (doi:10.1039/d0qi00117a), 2020-01-01
Supplement: d0qi00117a1.pdf [file d0qi00117a1.pdf]

# High-efficiency photocatalytic water splitting by N-doped porous g-C<sub>3</sub>N<sub>4</sub> nanosheets polymer photocatalyst derived from urea and N,N-dimethylformamide

## Supporting Information

Feng Guo,<sup>a</sup> Lijing Wang,<sup>b</sup> Haoran Sun,<sup>a</sup> Mingyang Li,<sup>c</sup> Weilong Shi,<sup>c\*</sup>

<sup>a</sup> School of Energy and Power, Jiangsu University of Science and Technology, Zhenjiang, Jiangsu 212003, PR China;

<sup>b</sup> Henan Engineering Center of New Energy Battery Materials, Henan D&A Engineering Center of Advanced Battery Materials, College of Chemistry and Chemical Engineering, Shangqiu Normal University, Shangqiu 476000, PR, China.

<sup>c</sup> School of Material science and Engineering, Jiangsu University of Science and Technology, Zhenjiang, 212003, PR. China;

\* Corresponding author's E-mail address: shiwl@just.edu.cn (W. L. Shi).

### 1. Characterization methods

Powder X-ray diffraction (XRD) data were performed on an X'Pert-Pro MPD (Holand) D/max-γA X-ray diffractometer with Cu Kα radiation ( $\lambda=0.154178$  nm), Fourier transform infrared (FT-IR) spectra were recorded on a Nicolet-360 spectrometer. X-ray photoelectron spectroscopy (XPS) measurements and valence-band XPS were carried out on an ARL Quant X-ray photoelectron spectrometer using Al Kα X-ray ( $h\nu = 1486.6$  eV). The morphologies and microstructures of the composites were examined by field emission scanning electron microscopy (FESEM, JSM-6360LV) and Transmission electron microscopy (TEM, FEI-Tecna F20). Solid-state <sup>13</sup>C magic angle spinning (MAS) NMR measurements were carried out on a Bruker AVANCE III 400 MHz WB solid-state NMR spectrometer at room temperature. The Raman spectra were tested on (HR 800 Raman). The room-temperature electron paramagnetic resonance (EPR) spectra were conducted on Electron Paramagnetic Resonance Spectrometer (BRUKER A300-10/12). The optical properties of samples were tested by a UV-vis spectrophotometer (UV-2450). Photoluminescence (PL) spectra of samples were tested by a RF-5301PC luminescence spectrometer with emission wavelength of 325 nm. The Time-resolved transient PL decay measurements were carried out by a fluorescence spectrophotometer (FLSP-920, Edinburgh Instruments). The specific surface area and pore-size distribution test were performed a Micromeritics ASAP-2050 porosimeter. The surface photovoltage (SPV) measurement was carried out on a surface photovoltage spectroscopy (CEL-SPS 1000, Beijing

Perfect Light Technology Co., Ltd). The photocurrent and the electrochemical impedance spectra (EIS) were tested using CHI 660b workstation in a 0.5 M Na<sub>2</sub>SO<sub>4</sub> solution with a typical three-electrode system.

## 2. Computational methods

All calculations were carried out using first-principles study based on the DFT within the projector augmented wave method (PAW), as implemented in Vienna ab initio simulation package (VASP) [S1, 2]. The generalized gradient approximation (GGA) with the functional of Perdew-Burke-Ernzerh of (PBE) was employed to describe the electron exchange-correlation interactions with the vdw-DF approach to take into account the long-range van der Waals interaction [S3, 4]. In this case, a supercell of 2×2×1 was used to simulate 2D g-C<sub>3</sub>N<sub>4</sub> monolayers. The slab was built along the z-axis and a vacuum spacing of 20 Å was used to avoid the interaction between the sheets. The structures were relaxed without any symmetry constraints with a cutoff energy of 500 eV. The convergence criteria of energy and force were set to 1×10<sup>-5</sup> eV and 0.01 eV/Å, respectively. Reciprocal space was represented by a Monkhorst-Pack special *k*-point scheme with 5 × 5 × 1 for geometry optimization.

## 3. Figures and Tables

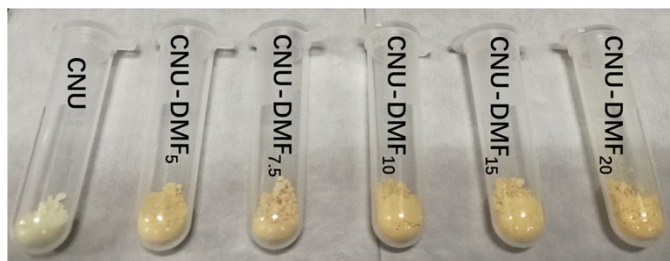

**Fig.S1** Digital photograph of as-prepared photocatalysts grains.

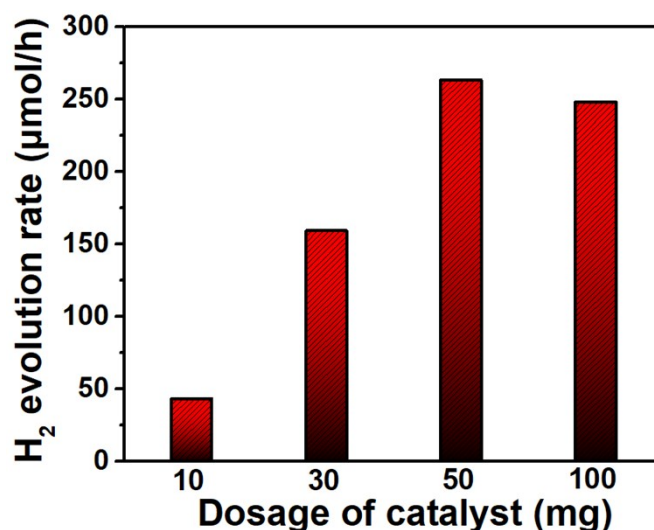

Fig.S2 The weight-dependent hydrogen evolution reaction of CNU-DMF<sub>10</sub>.

Table S1 N 1s peak area ratio of N-N, C-N=C, N<sub>3c</sub> and N-H<sub>2</sub> in the CNU and CNU-DMF<sub>10</sub>

|                       | C-N=C (%) | N <sub>3c</sub> -low binding energy (%) | N <sub>3c</sub> -high binding energy (%) | -NH <sub>2</sub> /N-N (%) |
|-----------------------|-----------|-----------------------------------------|------------------------------------------|---------------------------|
| CNU                   | 57.78     | 26.82                                   | 12.53                                    | 2.87                      |
| CNU-DMF <sub>10</sub> | 57.19     | 24.89                                   | 14.06                                    | 3.86                      |

Table S2 Peak area of XPS spectra N and C of and CNU CNU-DMF.

| CNU                   |                  |                 |          |           |
|-----------------------|------------------|-----------------|----------|-----------|
|                       | Area (P) CPS. eV | Area (N) TPP-2M | Atomic % | N/C ratio |
| C 1s                  | 19502.6          | 0.25            | 42.65    | 1.34      |
| N 1s                  | 42452.1          | 0.33            | 57.35    |           |
| CNU-DMF <sub>10</sub> |                  |                 |          |           |
|                       | Area (P) CPS. eV | Area (N) TPP-2M | Atomic % | N/C ratio |
| C 1s                  | 19248.4          | 0.24            | 37.19    | 1.69      |
| N 1s                  | 52621.8          | 0.41            | 62.81    |           |

Table S3 Hydrogen evolution rate of various N-doped g-C<sub>3</sub>N<sub>4</sub> photocatalysts.

| Photocatalysts | Light source | Reaction conditions | H <sub>2</sub> evolution rate (μmol/g/h) | Ref |
|----------------|--------------|---------------------|------------------------------------------|-----|
|----------------|--------------|---------------------|------------------------------------------|-----|

|                                                                |                                                        |                                       |       |                  |
|----------------------------------------------------------------|--------------------------------------------------------|---------------------------------------|-------|------------------|
| CNU-DMF <sub>10</sub>                                          | 300W Xe lamp,<br>$\lambda > 400$ nm                    | 3 wt% Pt,<br>TEOA (10<br>vol%)        | 5268  | <b>This work</b> |
| Ultrathin<br>porous N/g-<br>C <sub>3</sub> N <sub>4</sub>      | 300W Xe lamp,<br>$\lambda > 420$ nm                    | 1 wt% Pt,<br>Lactic acid<br>(20 vol%) | 3579  | [S5]             |
| C <sub>3</sub> N <sub>4+x</sub>                                | 300W Xe lamp,<br>$\lambda > 400$ nm                    | 3 wt% Pt,<br>TEOA (10<br>vol%)        | 553.5 | [S6]             |
| porous<br>nitrogen-rich<br>g-C <sub>3</sub> N <sub>4</sub>     | 300W Xe lamp,<br>$\lambda > 420$ nm                    | 3 wt% Pt,<br>TEOA (20<br>vol%)        | 2700  | [S7]             |
| nitrogen-rich<br>g-C <sub>3</sub> N <sub>4</sub><br>nanosheets | 50.0 mW cm <sup>-2</sup><br>LEDS $\lambda$<br>> 420 nm | 1 wt% Pt,<br>Lactic acid<br>(20 vol%) | 310   | [S8]             |

---

## References

- [S1] G. Kresse, J. Furthmüller, Efficient iterative schemes for ab initio total-energy calculations using a plane-wave basis set, *Physical Review B - Condensed Matter and Materials Physics*, 54 (1996) 11169-11186.
- [S2] P.E. Blöchl, Projector augmented-wave method, *Physical Review B*, 50 (1994) 17953-17979.
- [S3] J. Klimes, D.R. Bowler, A. Michaelides, Chemical accuracy for the van der Waals density functional, *Journal of physics. Condensed matter : an Institute of Physics journal*, 22 (2010) 022201.
- [S4] J. Klimeš, D.R. Bowler, A. Michaelides, Van der Waals density functionals applied to solids, *Physical Review B*, 83 (2011).
- [S5] N. Tian, Y. Zhang, X. Li, K. Xiao, X. Du, F. Dong, G.I.N. Waterhouse, T. Zhang, H. Huang, Precursor-reforming protocol to 3D mesoporous g-C<sub>3</sub>N<sub>4</sub> established by ultrathin self-doped nanosheets for superior hydrogen evolution, *Nano Energy*, 38 (2017) 72-81.
- [S6] J. Fang, H. Fan, M. Li, C. Long, Nitrogen self-doped graphitic carbon nitride as efficient visible light photocatalyst for hydrogen evolution, *J. Mater. Chem. A*, 3 (2015) 13819-13826.
- [S7] Y. Tang, M. Yuan, B. Jiang, Y. Xiao, Y. Fu, S. Chen, Z. Deng, Q. Pan, C. Tian, H. Fu, Inorganic acid-derived hydrogen-bonded organic frameworks to form nitrogen-rich carbon

nitrides for photocatalytic hydrogen evolution, *J. Mater. Chem. A*, 5 (2017) 21979-21985.

[S8] X. Wu, D. Gao, P. Wang, H. Yu, J. Yu,  $\text{NH}_4\text{Cl}$ -induced low-temperature formation of nitrogen-rich g- $\text{C}_3\text{N}_4$  nanosheets with improved photocatalytic hydrogen evolution, *Carbon*, 153 (2019) 757-766.
